# Supplementary material for: CoastalME version 1.0: a Coastal Modelling Environment for simulating decadal to centennial morphological changes
Source: Copernicus journal article supplement (doi:10.5194/gmd-2016-264), 2016-11-15
Supplement: Supplementary file [file gmd-2016-264-AC1-supplement.pdf]

## Reviewer #1 responses

The authors appreciate the comments and feedbacks provided by Reviewer #1. Please find below a detailed description about how the authors has addressed both the general and detailed reviewer's comment on the reviewed manuscript.

(R = reviewer comment; A = authors response)

### General comments

**R:** *Sediment-transport models represent processes with a mix of fundamental physics, empiricism, and heuristics. Physics in CoastalME is limited to conservation of mass and wave energy. Empirical formulae are used for longshore transport, and heuristic models are used to represent the beach shape (Dean profiles) and vertical distribution of erosion rates ( $f_1$ ) on cliff faces. The equations for longshore transport rate, beach profiles, and cliff erosion depend on calibration coefficients including  $K_s$ ,  $A$ ,  $R$ , and the profile  $f_1$ . These coefficients do not have universal values, but depend on grain-size distributions, assumptions about underlying stratigraphy, rock properties, wave climate, and other site-specific variables that might evolve over time. In addition, CoastalME depends on a number of user-specified parameters that are likely to change results, including the raster cell size, the spacing of shore-normal profiles, the selection of closure depth, timing of cliff collapse, the distribution and relative erodibility of noncohesive sediment, the depth to non-erodible basement, and others.*

**A:** It is important to emphasize that CoastalME is not a model it is a framework for building coupled Large-Scale Coastal Behavioural (LSCB) models. This manuscript describes the elements of the framework and, as a proof of concept, how the framework may be used to integrate two models: one for cliff-beach interaction (SCAPE) and one for alongshore sediment transport (COVE). With this in mind, the reviewer's general comments are both perceptive and encouraging since they recognise that the CoastalME framework satisfies some of the fundamental requirements of any LSCB model (i.e. mass conservation and sediment transport driven by wave energy), and also enables representation of the temporal and spatial variability of the attributes that influence coastal change (i.e. sediment size, stratigraphy, rock properties, wave climate...). We fully acknowledge that (as with all non-reductionist models) some user-specified input parameters will influence results. A sensitivity analysis of the framework is planned. This will assist us in selecting sensible default values of these parameters for users, and in advising users on the limits of applicability of these values.

**R:** *The paper uses mostly prose, rather than equations or diagrams, to portray the model mechanics. This makes some of the sections long, sometimes confusing, and ultimately not sufficiently informative. Said another way, it would not be possible to reproduce the model structure or even the fundamental grid / profile / polygon geometry based on this description. Some well-designed diagrams with formulae showing how profiles relate to the raster grid would be helpful. Several of the figures describe aspects of other models, and they could be removed and replaced with diagrams specific to CoastalME.*

**A:** We acknowledge that the figures should be both improved and made more specific to CoastalME; this has been done on the revised version of the manuscript. Regarding the description of 'model mechanics': again, it is important to emphasise that CoastalME is a framework, not a model. The novel element of our work is in developing a framework which is capable of integrating component models. The component models need not themselves be novel, and indeed we have chosen here to

integrate two well-documented component models: SCAPE and COVE. We have supplied equations which capture the essential characteristics of each component model. But it is not at all clear how one might use equations to describe the integrating framework. We have, instead improved the description of the framework mainly by improving the figures, in particular showing how coast, profiles, and polygons relate to the raster grid and how they are dynamically updated every time step. Additionally, the source code of the CoastalME framework is both freely available and well documented (see below). The combination of the revised manuscript and the source code documentation will provide a comprehensive description of the framework's structure.

**R:** *The authors argue that CoastalME provides an alternative object-oriented approach that combines advantages of both raster-based and vector based structures. The model is a work in progress, and the potential for coupling more landscape objects remains to be achieved. The advantages of the raster-vector combination are not readily apparent in the two cases presented, and the approach seems to require a lot of iteration and smoothing. Overall, the present model formulation does not appear to be usable for the purpose of informing coastal management, and the paper does only a fair job of describing the model.*

**A:** CoastalME is a novel framework for integrating component models: it is not a model. Raper and Livingstone (1995) suggested that the next step in model integration should be a spatial representation of component models within an object-oriented environment, rather than an ad-hoc integration of incompatible systems, which inevitably forces representational compromises. Here, we have demonstrated how the concepts behind the cliff-beach interaction in SCAPE and the shoreline response to changes in alongshore sediment transport gradients in COVE can be integrated in CoastalME. We do not claim that the integrated SCAPE-COVE is currently usable for the purpose of informing coastal management. In this paper, we limit ourselves to a description of the framework's structure and the philosophy which underpins it, together with some results from a linkage of SCAPE and COVE as proof of concept. We will aim in subsequent publications to demonstrate the potential of CoastalME's linked raster-vector approach for informing coastal management. Please note, too, that smoothing is used only when tracing the coastline and when determining slope gradients on profiles. Mass is fully conserved within the CoastalME framework. For more regarding the description of the framework, see below.

Raper, J. and D. Livingstone (1995). "Development of a geomorphological spatial model using object-oriented design." *International Journal of Geographical Information Systems* 9(4): 359-383.

**R:** The authors deserve great credit for providing open-source code. The model is easy to find on github, and builds easily on Linux. The same is true for SCAPE. The code is well commented and documented with Doxygen. However, I could not find input files to run a demo cases.

**A:** The authors are grateful for the reviewer's acknowledgement of the value of open-sourcing CoastalME's code, and providing Doxygen documentation. The inputs and outputs used for the test cases can be found at [http://www.channelcoast.org/iCOASST/COASTAL\\_ME/](http://www.channelcoast.org/iCOASST/COASTAL_ME/). This is now clearly stated in the revised manuscript. Finally, regarding the earlier comments on reproducibility and adequacy of the description of the CoastalME framework: we suggest that the free availability of the CoastalME code, and the effort that has gone into documenting this code, are both relevant. The CoastalME source code is itself intended to be part of the framework's description. The free availability of the source code means that any scientist who wishes to learn more about the CoastalME framework, or to modify it, is easily able to do so.

**Detailed comments (L#: Line number)**

**R:** *p7 l8 I do not agree that the “most general” way to account for sediment is in a 2DH grid. Maybe you mean “most common”. p8 I do not agree with the argument that small cells are required by fast-moving information. Small cells improve resolution, especially of sharp fronts, as long as numerical diffusion is limited. Note that CFL constraints apply to explicit formulations; time steps can be greater than CFL with implicit formulations.*

**A:** “Most general” has been replaced with “most common” on the revised manuscript. The note on CFL constraints has been also added for completeness.

**R:** *Section 3.1 l17 says the model preferentially locates profiles on capes, but this does not appear to be the case in Fig 9 or Fig 10. As mentioned below, a figure showing how raster cells are associated with profiles and sediment fluxes would be helpful. Does the random spacing of profile change the results? What artefacts are being avoided by doing this?*

**A:** A bug on the cape-normal allocation has been fixed and Figures 9 and 10 have been re-edited. A new figure showing how raster cells are associated with profiles and sediment fluxes has been added (new Figure x). Coastline profiles can be allocated at a deterministic alongshore spacing or allow some randomness of the spacing. For the test cases presented here, using deterministic or random spacing has no effect on the results. Having the random option allows the user quickly assess the sensitivity of the results to user-defined parameters such as profile spacing. Profiles are conceptual constructs that we use to simulate complex 3D open systems. The polygon averaged properties (i.e. grain size, rock resistance,...) will vary with the profile distance and will influence the amount of sediment being eroded/transported between polygons. We acknowledge that this might create artefacts but this will be likely site-specific.

**R:** *Section 3.2 If I understand this correctly, wave properties are calculated for each cell, based on properties of the seaward cell, which accounts for local refraction and breaking. I don't think this method conserves global wave energy and allows it to be focused on regions of converging wave-propagation rays (ie., headlands) or away from bays. I think this is evident in Fig 10, where it appears that wave energy is not concentrated on the tips of the cusps. COVE uses an approach to decrease wave energy in shadow zones (but not, as far as I can tell, to concentrate energy on headlands) but this is not yet implemented in CoastalME. In keeping with the modular approach to CoastalME, it seems like a raster-based wave model like SWAN could be used here.*

**A:** The cape-normal allocation algorithm purposes is in place to ensure that wave energy at the capes is well captured using the simple linear wave theory. We have fixed the bug on the cape-normal allocation (see previous comment and new Figures 9 and 10) and wave energy focusing on capes is now clear. For completeness with COVE, we have also implemented the simple refraction and shadowing rules included in COVE. The reviewer is correct in noticing that a raster-based wave component model like SWAN could be replace the simple linear wave propagation component model that we have implemented. This modularity is one of the strengths of CoastalME.

**R:** *Section 3.3. Eqns 4 and 5 are bulk transport equations calibrated to the median grain size. It is not clear that they should be applied separately to fractions of the unconsolidated sediment, or what the coefficients would be in that application. The description of sediment flux and net erosion or deposition is confusing and could be improved with a figure and/or equations (e.g., the discrete*

*version of Eqn. 3, with  $f$  defined). It is not clear where the fluxes are located (at profiles or between them) and whether the supply-limited contribution from an eroding cell is ameliorated by contributions to that cell from upstream. It is also not clear how the varying sizes of the polygons are accounted for in  $f(dQ/ds)$ , because the relationship between  $dn/dt$  and elevation changes (or displacement of Dean profiles) depends on the varying polygon areas (or profile lengths). The text at the bottom of p.18 tries to explain how this is done, but does not mention polygon area, and indicates that erosion or deposition is accommodated by changing the profiles at polygon edges, rather than over the entire polygon. It is difficult to see how this can be done in a consistent way that conserves mass, adjusts profiles as grain size changes, and does not produce unrealistic discontinuities.*

*The authors state that two profiles could merge if they intersect offshore, and on p19, l13, they indicate that sediment flux is pro-rated according to the shared length of the boundaries. This has the potential transporting sediment among polygons that mate only at depth, bypassing a shallower polygon, which seems unrealistic.*

*All of this sounds very iterative and ad hoc, but maybe some diagrammed examples would clarify the process.*

**A:** The bulk alongshore sediment transport is calculated using a median grain size and not for each sediment fraction independently. This has now been clearly stated in the revised manuscript. The description of sediment flux and net erosion or deposition has been improved with a new figure that illustrates how the potential erosion for each polygon is calculated (similar to Figure 11 that has been acknowledged by this reviewer to be a good figure) and we have made the equations explicit. Mass is conserved by ensuring that all shared sediments between polygons is either deposited on the polygon cells or keep it in suspension. As stated in p21 l 22 “Checks are performed during this loop to ensure that cells are not eroded several times and that there are no cells within the active zone of this polygon at which the actual erosion potential has not been calculated”.

In respect to the comment about sediment bypassing only at depth, we advise that on concave coastlines (which are commonly found) polygons meet at relatively shallow water (i.e. well within the active zone) and it is therefore realistic to share sediments between polygons.

**R:** *p. 19 l24-27. Smoothing the grid is a diffusive procedure, as is smoothing the coastline.*

**A:** Grid smoothing is not needed in the current version of the CoastalME framework, and the grid smoothing routine has been removed from the updated code. It is important to notice that, the coastline is only smoothed to draw the profiles. The start of the coastline profiles is the raster cell identified as a coastal point by intersecting the water level at each time step with the DEM. Coastline smoothing ensures that each profile's planform orientation is not unrealistic, as would be the case with an unsmoothed coastline directly constructed from the discrete cells of the raster DEM.

**R:** *Section 3.4. Most modellers use the term periodic, rather than “mobius”, to refer to boundary conditions that feed output from one boundary back into the model at the opposite boundary.*

**A:** Mobius has been replaced by periodic as suggested, in the revised manuscript.

**R:** *Section 3.5. I have not seen an equation for  $f_1$  in either this paper or the SCAPE papers I have read. It seems like an interesting heuristic approach, and it would be helpful if the curve of  $f_1$  derived from Fig 5b in Walkden and Hall (2005) was specified. This section describes the cliff erosion process with the prose approach that could be improved with a figure showing how the Dean profile is applied.*

**A:** A new figure showing how the Dean profile is applied is now included (Figure X). A look up table (i.e. instead of a function) has been used to replicate the Fig5b in Walkden and Hall (2005). The values used to represent the shape function has been included as a new Table X.

**R:** *References. A few of the references refer to ephemeral sites like Wikipedia that don't always serve as a reliable citation. No DOIs are provided.*

*Following references are incomplete: Hutton 2014 Payo 2014 Stive 1997 Terwindt, 1990 van Rijn, 2002 Walkden, 2015.*

**A:** References to Wikipedia has been replaced by peer reviewed papers and DOIs included where missing. The above-cited reference has been amended on the revised manuscript.

**R:** *Fig. 1 This could be omitted or replaced with a figure that represent the geometry of CoastalME. Fig. 2. This could be omitted or replaced with a similar figure that represents the processes in CoastalME. Fig 3. This could be omitted. Fig 4. This is a key figure that could be improved. One flaw is that it shows profile changes at the depth of closure...I would assume that no changes should occur at or seaward of this depth. A zoomed in figure that shows the relationship between the raster cells, the boxy coastline found by tracing the raster, the smoothed version of the coastline, the projection of the shore-normal profiles, and the raster cells associated with each profile that "share" sediment with adjacent profiles. Fig 6. This could be omitted. The directional convention is a level of detail needed to make input files, but not to describe the model. Fig 7. This figure could be eliminated. Text in Section 2.3 covers this in better detail. Fig 8. This figure is illegible. It might be useful in a developers guide, but this paper does not deal with the object structure in detail. It could be eliminated. Fig 9. Why are the profiles not parallel in panel b? Why is the spacing so variable in all panels? Why are there no profiles on the capes in panel d? Can this figure be used to show the association with the raster grid and the polygonal sections? Fig 10. Same questions about profile location and spacing. In addition, the distribution of wave energy does not look right. Wave heights should be highest on the headlands, especially in the 270 deg. case. Fig. 11. This is a good figure. A similar figure showing how the sediment is redistributed to make a Dean profile would be helpful.*

**A:** Fig. 1 has been replaced with a figure that better represents the geometry of CoastalME. Fig 2 has been re-edited to more clearly illustrate how is represented in CoastalME. Fig. 3 has been omitted. Fig. 4 has been improved to show the relationship between the raster cells, the boxy coastline found by directly tracing the raster, the smoothed version of the coastline, the projection of the shore-normal profiles, and the raster cells associated with each profile that "share" sediment with adjacent profiles. Fig. 6 has not been omitted for completeness. This manuscript is intended to be the key descriptive reference for the CoastalME framework and so, in the authors' experience, it is good practice to explicitly show the direction convention used. Fig. 7 and Fig. 8 has been omitted. Fig 9 and Fig 10 has been re-edited after fixing the bug on the cape allocation routine. A new figure X, showing how the sediment is redistributed to make a Dean profile, has been added.

**R:** *Technical corrections Eqn. 1. Missing  $g$  in denominator of second term on right Eqn. 4.  $K_I$  is not defined. Eqn. 5. the coefficient 2.33 assumes seawater density of 1030 kg/m<sup>3</sup> (van Rijn, 2005), not the value of 1025 kg/m<sup>3</sup> specified on l16. Eqn. 6. The dimensions in this equation don't work out...the right side has dimensions of  $m^{-2} s^{-1}$ ...so volume transport per meter width. It might be good to*

*define immersed weight transport and show the relationships between I, volume transport, and mass transport. Eqn. 8. The slope should be  $dzs/dys$  or  $\tan(\alpha)$ , but not  $\tan(dzs/dys)$ . Eqn. 9. Same comment.*

**A:** Missing g in Eq (1) has been added. The definition of KIs in Eq 4 is now included. The density value on l16 has been changed to 1030 kg/m<sup>3</sup>. Eqn. 6 is volume transport per meter width. The relationship between the immersed weight transport and mass transport are found elsewhere (i.e. van Rijn, 2002) and therefore not included. The slope has been expressed as  $dzs/dys$  in Eqn 8 and 9.

**R:** *Typos p2 l20 pool of well-understood open-access models... p4 l4 models (Murray... p4 l27 Volumetric model(s) represent . . . p5 l5 COVE is inspired by the Coastal Evolution Model. . . p6 l11...geometrically constrained by human interventions p7 l3 Sediment is stored as . . . or in suspension p7 l9 last phrase does not seem to make sense p8 l17 Lewy Condition p25, l4 all three*

**A:** The above typos have been amended on the reviewed document.
